# Supplementary material for: The Dynamic DNA Demethylation during Postnatal Neuronal Development and Neural Stem Cell Differentiation
Source: Hindawi journal article supplement (doi:10.1155/2018/2186301), 2018-01-01

Supplemental Figure 1

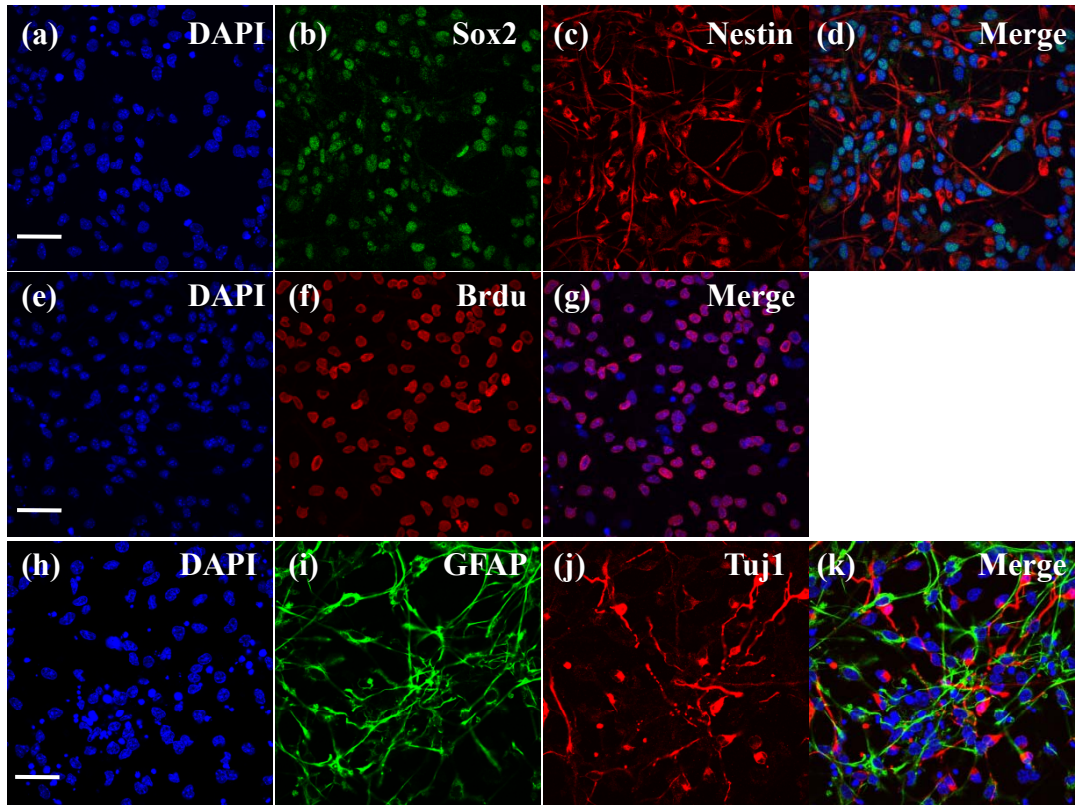

Supplement: f1 [file 2186301.f1.pdf]
